# Supplementary material for: Development of an SNP Assay for Marker-Assisted Selection of Soil-Borne Rhizoctonia solani AG-2-2-IIIB Resistance in Sugar Beet
Source: MDPI journal article supplement (doi:10.3390/biology11010049), 2021-12-29
Supplement: s1 [file s1]

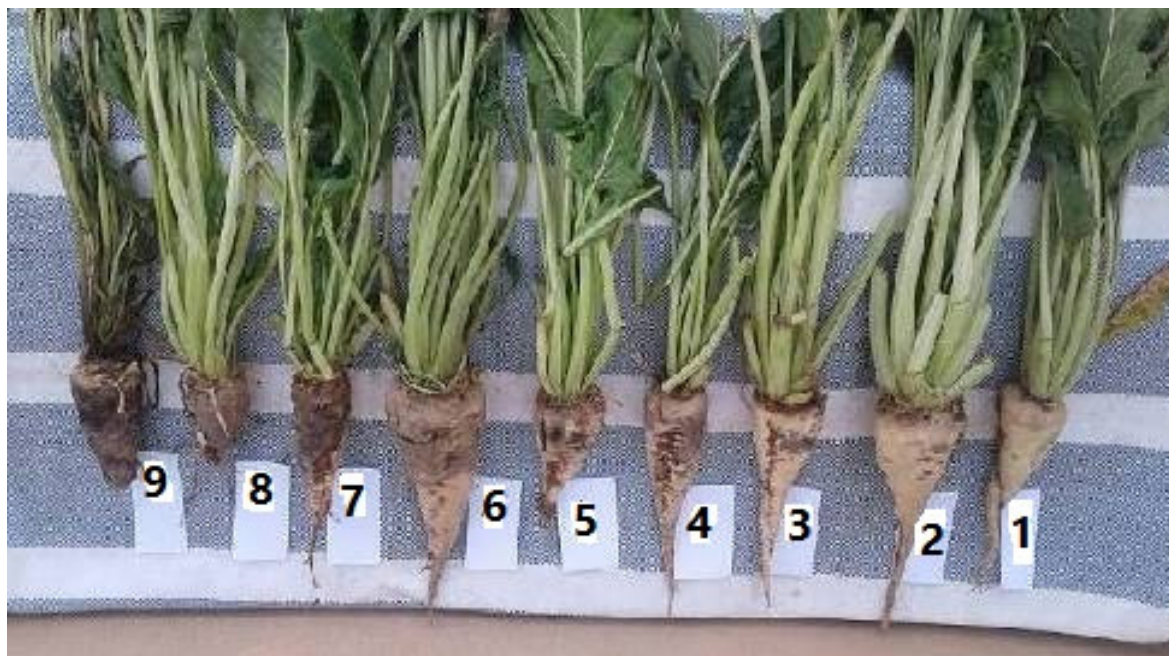

**Supplementary Figure S1:** *Rhizoctonia* scoring scale for phenotyping done in SBSI, Iran.

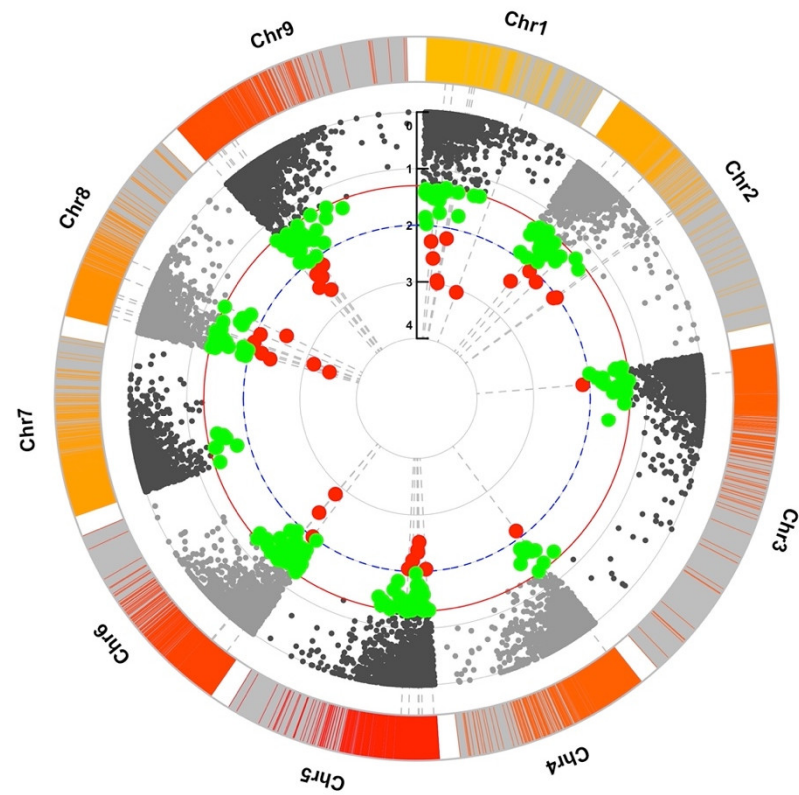

**Supplementary Figure S2:** Circular Manhattan plot from association analysis showing significantly associated SNPs from SBSI dataset distributed across the EL10 sugar beet reference genome. SNPs highlighted in green have a p-value  $\leq 0.05$  and SNPs highlighted in red have a p-value  $\leq 0.01$ .

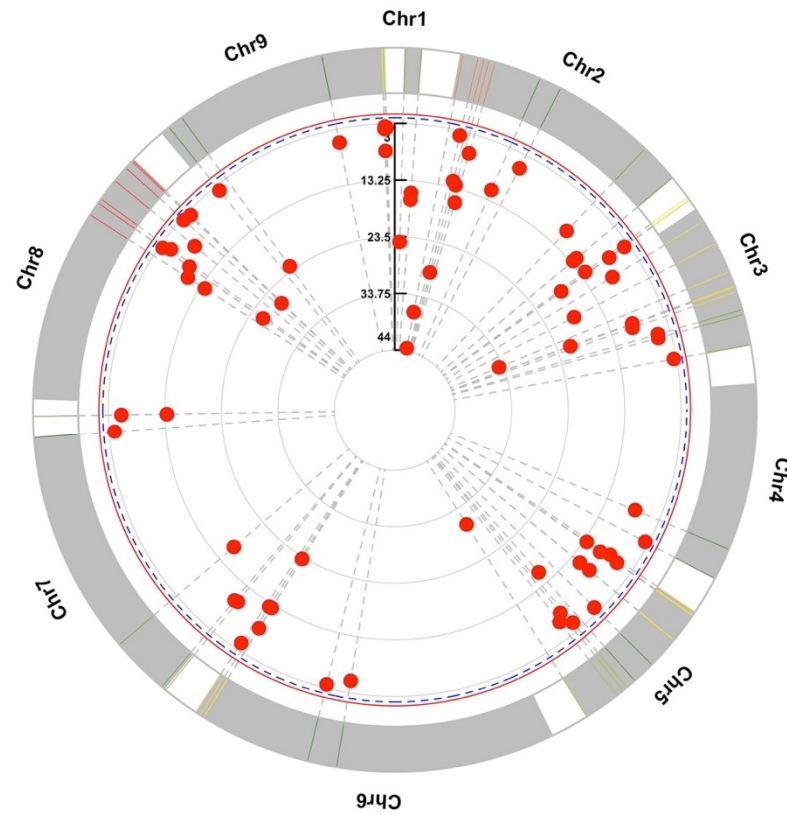

**Supplementary Figure S3:** Circular Manhattan plot from association analysis on Strube Research germplasm highlighting mutually occurring significant SNPs with the association analysis from SBSI dataset. SNPs highlighted in red were identified as strongly discriminating the contrasting phenotypes with a p-value  $\leq 0.01$ .

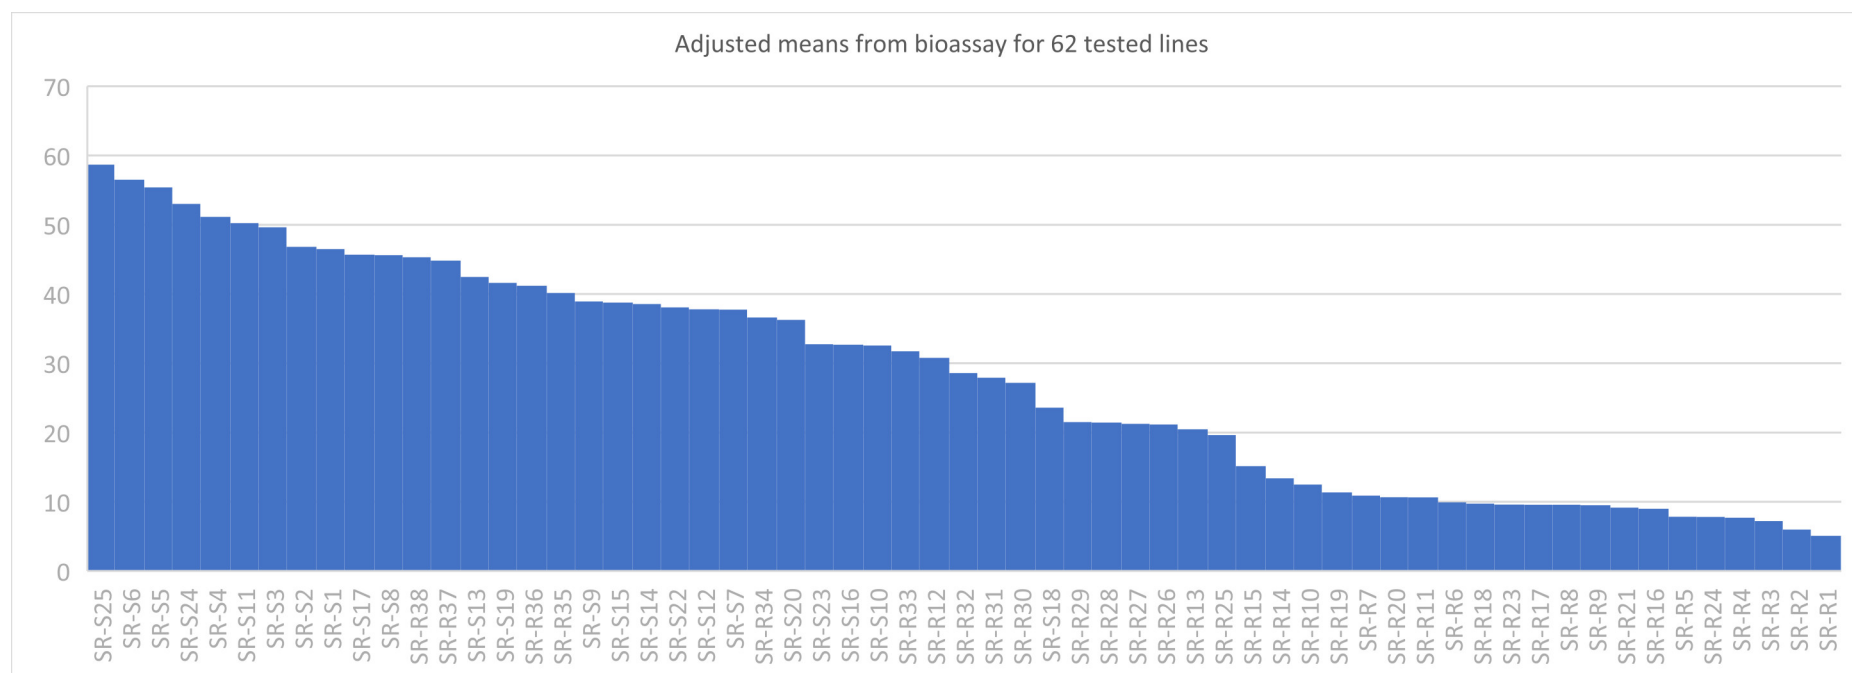

**Supplementary Figure S4:** Adjusted means of 62 breeding lines (including standards and controls) from *Rhizoctonia* bioassay.

**Supplementary Table S1:** Sequences of top 60 significantly associated SNPs discriminating resistant and susceptible phenotypes from the bioinformatics analyses.

| SNP    | Sequence                                                                   | SNP position | Reference allele | Alternate allele |
|--------|----------------------------------------------------------------------------|--------------|------------------|------------------|
| SNP26  | TGCAGTGATCTCTTTTCATGTTGTATTGCTCTATAGCGTACACGACCATGTTGGCACTCCAA<br>CCACTTGA | 61           | A                | T                |
| SNP32  | TGCAGAAGATGGAAGGCAGCAAAATATTTCTTCATACCATCATCGTCATAATCATCTAAA<br>TATCTGGGG  | 66           | G                | A                |
| SNP125 | TGCAGATCATACAAGGTATTCCAAATGCAACTGCTGTGCAGCTTGATGTGTCAGACCAAG<br>AGAGTTTGC  | 6            | A                | G                |
| SNP116 | TGCAGGTTCGTCTACCACTAAACGTCTTCTTACCAGTTCTGTTACAGATCGGAAGAGCGGT<br>TCAGCAGG  | 9            | C                | T                |
| SNP4   | TGCAGAGCCGCTACTCACCGCTGCCTGTTCTTATCTCTCCTCTGTTGAAGTTCCTTTTTCTT<br>CTTTTAT  | 62           | T                | C                |
| SNP81  | TGCAGTATGTACACAAAAGGATCAGCCAATCTTAGACTACAGCTAACCAAGCAAAACAA<br>AGAACTTCAA  | 30           | T                | C                |

|            |                                                                            |    |   |   |
|------------|----------------------------------------------------------------------------|----|---|---|
| SNP12<br>6 | TGCAGTGGTACCGAGTGTGCCCTTTGGTTTTTGCAATACTGCATAATTTTACCTGGTTTGC<br>CTCCATTA  | 12 | C | T |
| SNP47      | TGCAGAAGAACATATATCATTAGCTTACCAAAATTACAGATCGGAAGAGCGGTTTCAGCAG<br>GAATGCCGA | 20 | T | C |
| SNP62      | TGCAGAAGCACAAGATGAAGAGGAGCAAGATGAGGAGATGCTGCGCAGTTCGTGCTGCA<br>ACCAGAGTAC  | 45 | G | A |
| SNP75      | TGCAGTTTTGGGACACTTGACTTGTATATCAACTGAACTTTCGCCACAAGTTTGGTACAGA<br>TTACTCAG  | 13 | A | G |
| SNP43      | TGCAGTTTTGGGGCACTTGACTTGTATATCAACTGAACTTTGGCCACAAGTTTGGTACAGA<br>TTACTCAG  | 21 | C | A |
| SNP53      | TGCAGTCAGAAGAAATGCAGCAGCCCAGGTGATCGCCAGACCCAAGGGAACCTGACAAC<br>AGCTTATTAG  | 34 | C | T |
| SNP16      | TGCAGATTTTTCTCCACGCATCTAGCAAACTCTGAAAGCTACCAGTGGTGAATTGCTGAT<br>TTTTCAAC   | 27 | A | T |
| SNP19      | TGCAGTCTTGTGGAGATAAGGCTGGATTAGCGTGTTTTGAATATTTACAGATCGGAAGAG<br>CGGTTTCAGC | 30 | G | C |
| SNP86      | TGCAGCTGAAGCACGACCCACAGACCACCAAGGAGCATGGGCCTTGTGACATATACAGC<br>CACTAGCATC  | 51 | A | G |

|            |                                                                            |    |   |   |
|------------|----------------------------------------------------------------------------|----|---|---|
| SNP21      | TGCAGCCAATTCACTGGTGGGCTTTTGCTGATACAATGTTTCATAGAAAATCCTCAAAGG<br>ATCTCTCTG  | 52 | C | T |
| SNP91      | TGCAGTTTTGTTAGATTCTGAAGATTCATGATGCCAATAAATTGACATTTATTGTTCTTGA<br>TTGAATTG  | 66 | A | C |
| SNP18      | TGCAGTTATGACATGGCAACATGCATAGCAGAAAAATTACAGATCGGAAGAGCGGTTCA<br>GCAGGAATGC  | 31 | G | C |
| SNP15      | TGCAGTAAAAAAGTTCCAAAGATGGGAATGGCACCTTCTTTTTTACAGATCGGAAGAGCG<br>GTTTCAGCAG | 32 | C | T |
| SNP71      | TGCAGACTATAATGCAAATCTTAGTTGCTTCCCTCTTCTCTTCTATTATTCTATGAGGTGT<br>GATGATA   | 51 | T | A |
| SNP17      | TGCAGTCTAAGTACTTGATATTTATTTGCTTCCTAAAATACACCTTTCCTGTAATTATGT<br>GAGTATT    | 27 | T | C |
| SNP11<br>3 | TGCAGGCCTTGGCAATCCTGAGCTTTCTCATTACAAGTTGAACCTACAAGAAAGTGCTTCT<br>AACAGAAG  | 47 | C | A |
| SNP72      | TGCAGGCATAGAGAGGAATGATGCAAATTGTCTGAGAAGGCTATATTACAGATCGGAAG<br>AGCGGTTTCAG | 29 | T | C |
| SNP58      | TGCAGATCCAAAGACAAAAGAGGATGTACACAAAGTGCCTAACAGGGAGACGCTCACCT<br>TGTAAGTTCT  | 51 | C | A |

|       |                                                                            |    |   |   |
|-------|----------------------------------------------------------------------------|----|---|---|
| SNP20 | TGCAGTGATCGCTCCCAAGAAGGCCTGGACAGGGGATGGGGTTTTAGATTCAATCGAGAC<br>TGATCCAAT  | 10 | C | T |
| SNP34 | TGCAGCAGGAGTTGTCTGCTGCTAAAACAGAAGTAAACAGAGTTGAGTCAAGTATGGCTG<br>ATGCATTAT  | 14 | G | A |
| SNP29 | TGCAGCCGCGACTAGCTGCACCGGTGGAGTACCAACAGAGATTTGCATAAGGAAATCTCC<br>CTCATTAGG  | 63 | C | G |
| SNP1  | TGCAGCCGTTTTCTTACTTTTCCTACTCTACTATCTTTCCAGCCACAACGAGGCAAAAACA<br>CCAAACTC  | 24 | T | C |
| SNP55 | TGCAGTTACATTTTTGCCCTCTTTATTCGTCGCTTTCTCCACTATTTACGTTTCATTCCAA<br>GTATCCA   | 57 | T | A |
| SNP12 | TGCAGATGATTTGGCTTGCTCCCTGAACCCCTCCTAGAAAGGTGGCAGGAAGTTACAGATC<br>GGAAGAGCG | 6  | A | G |
| SNP23 | TGCAGTCTGATGACCATTGTTGCAACTCTTGTGAAGAAGTTCGTGAGGCTTACAGAAAGA<br>AGGGCTGGG  | 65 | C | A |
| SNP50 | TGCAGAAAACTTGACTTCAGAAGATTTACTACCCTCTTTGTGGGATAAATGCAAGGTGA<br>GCAAAATCA   | 26 | T | C |
| SNP96 | TGCAGATTATGAAATACACATGTATGATTGTATAAATTGATGGTATATTGTGGTGTATTTT<br>TAGGTGGA  | 17 | C | T |



|            |                                                                            |    |   |   |
|------------|----------------------------------------------------------------------------|----|---|---|
| SNP24      | TGCAGAAAATGTATTTTCCTTCCTTCCAACATTTTCCCATATCAACTTCATTACAGATCGGA<br>AGAGCGGT | 30 | A | G |
| SNP42      | TGCAGAAATTGCTTTACGGTTATCCAGATAAACAAGAAGATGACTAAAATATTCTCTAAC<br>CATGAGGTC  | 54 | C | T |
| SNP69      | TGCAGCATCAGCGATGCTTATTTGCATTGAGTGGATTACAGATCGGAAGAGCGGTTCAGC<br>AGGAATGCC  | 11 | G | A |
| SNP11<br>0 | TGCAGCATCAGTGATGCTTATTTGCATTGAGTGGATTACAGATCGGAAGAGCGGTTCAGC<br>AGGAATGCC  | 12 | T | C |
| SNP64      | TGCAGCATCTGACATTTGAGAACTGGTGAAATATTTTCAGCACATATTCTTGCGACAACA<br>ATGCGCTCA  | 65 | G | A |
| SNP8       | TGCAGACTACATAAATGCACGGGGGTTAGAATATATGTGTGCCTCTGAAAGACTGAAACA<br>ACATTTTAC  | 69 | C | G |
| SNP67      | TGCAGATATCTCAAATCTGGATAACAGAAAATCAAAGATCCGTGGATGCGTATTACAGA<br>TCGGAAGAG   | 12 | C | G |
| SNP59      | TGCAGATATCTGAAAATCTGGATAACAGAAAATCAAACATCCGTGGATGCGTATTACAGA<br>TCGGAAGAG  | 38 | C | G |
| SNP56      | TGCAGCCACCTATTCCATTTTCATGGACGTATCACTCTGACCTCATTAGAGCTGCTCATCA<br>GACTGGAG  | 29 | G | T |

|            |                                                                            |    |   |   |
|------------|----------------------------------------------------------------------------|----|---|---|
| SNP13<br>0 | TGCAGAAAGCTTCAGCTTTGCTCTACCTAAATTTCAATCTTTCTTGAGTTCGTAGGGGTTC<br>AAGCCTGC  | 23 | C | T |
| SNP10<br>4 | TGCAGATATGGAATCGAGAGTGAATGAAAATGTATGGCAACGATTTGGGATTGAGCAAC<br>ATCCTCCGCG  | 41 | C | A |
| SNP49      | TGCAGGGTTGCTTGGAGCTTGTTGCCAGGTACTGGTGCTCGGATTATTGCTTTGGTGGGT<br>GGTCCTTG   | 67 | T | A |
| SNP41      | TGCAGAGTTGTCTTTCCTGCAACTCTAATCTTTAGGGAAATCCCCAATGATAGGCTCCTAT<br>TTTTTAGA  | 24 | T | C |
| SNP60      | TGCAGCAAGGACAACCTCCGTGCACATTGGATGTTGGGCAAAAACCAATAGCTGACATTTG<br>ATTCAGCAA | 18 | C | T |
| SNP46      | TGCAGAAGTTTGGATTCTGAGAATAATAGTTGCTATGTTTTTTATGGTGGAATTCTCAAT<br>ACTCCGAA   | 49 | G | A |
| SNP51      | TGCAGGATATTGCATTTTCATCGGTATAATGGGGTTCACGTTATTGGAAGATGCACAGGAG<br>AATTTGTAC | 55 | C | T |
| SNP57      | TGCAGCTATGGTGCATAAACAAAAGGGGTCCAGTTTTTGCTGCAATGTTTACAGATCGGA<br>AGAGCGGT   | 41 | T | C |
| SNP70      | TGCAGCCCAGATTCCCTCCTTAGAACAACACTCATTTATTAGGTTACAGATCGGAAGAGC<br>GGTTCAGCA  | 14 | C | T |

|            |                                                                             |    |   |   |
|------------|-----------------------------------------------------------------------------|----|---|---|
| SNP11<br>9 | TGCAGAACTTCGTTTACTCTTATGATTCCCCGAGCTAGCTTTGCAACATCCATGGAAAGGG<br>AGTTGGAA   | 56 | A | C |
| SNP10<br>9 | TGCAGGTACTTACGGGCGAAGCAAGTCTACCATCAGTCCCTTTTGAGAAGCCTGCCTTTGT<br>ATGGCCAG   | 14 | G | A |
| SNP94      | TGCAGGAGTCGATTCCAACCAACGCCACAAATTTTAGATGGTTGCATTTCACTGTTGGCA<br>GAAGGTATT   | 10 | C | T |
| SNP22      | TGCAGTATAGAATGATAATTCCTAGTCTTGGTGATAATGTCCGGGTAATAAAATCTAATT<br>CCTAGTTT    | 43 | G | A |
| SNP7       | TGCAGAAAAAAGCGCAGATGAAAGAAAAGAAACATATTCTTTACAGATCGGAAGAGCGG<br>TTCAGCAGGA   | 13 | C | T |
| SNP27      | TGCAGCAAGTTCAATACCAACCGTTACTATATCCAAGATTTCTAAAAGGGGATAGAAGTA<br>GCTTTACAG   | 41 | T | C |
| SNP76      | TGCAGGTACATATGATAATTGATATGGCAGAAATGATTGCTTCAAGTAGTGTCCATTTAG<br>GGAATTTTA   | 38 | T | A |
| SNP93      | TGCAGATACAAGATATACCAAAAACAAAAAACAAAAACATAGCATATCTTGTA AAAAGAT<br>GGATCTAATT | 24 | C | T |
| SNP10<br>2 | TGCAGCACAAATAAATGGCGTGCTTTATGTTGTTGGTGGATATGATGGAAGTGTATACCT<br>AGGGTAAGC   | 23 | A | C |

**Supplementary Table S2:** Ruppel scores (Scholten et al., 2001) of USDA releases from field rating done in 2018 used for validation of SNP93.

| <i>Release</i>    | <i>FC709-2</i> | <i>FC709-2</i> | <i>FC709-2</i> | <i>FC703</i> | <i>FC703</i> | <i>FC703</i> | <i>FC901/C817</i> | <i>FC901/C817</i> | <i>FC901/C817</i> |
|-------------------|----------------|----------------|----------------|--------------|--------------|--------------|-------------------|-------------------|-------------------|
| <i>genotype</i>   | 20121034       | 20121034       | 20121034       | 20041005     | 20041005     | 20041005     | 20141002          | 20141002          | 20141002          |
| <i>Replicate</i>  | Rep1           | Rep2           | Rep3           | Rep1         | Rep2         | Rep3         | Rep1              | Rep2              | Rep3              |
| <i>field plot</i> | 2002           | 2040           | 2070           | 2001         | 2041         | 2063         | 2000              | 2034              | 2064              |
| <i>Plant 1</i>    | 1              | 3              | 1              | 1            | 3            | 4            | 5                 | 6                 | 5                 |
| <i>Plant 2</i>    | 1              | 2              | 2              | 2            | 3            | 3            | 6                 | 5                 | 1                 |
| <i>Plant 3</i>    | 1              | 2              | 1              | 1            | 2            | 3            | 5                 | 7                 | 2                 |
| <i>Plant 4</i>    | 1              | 1              | 2              | 1            | 2            | 3            | 5                 | 6                 | 4                 |
| <i>Plant 5</i>    | 2              | 2              | 1              | 3            | 1            | 3            | 5                 | 5                 | 4                 |
| <i>Plant 6</i>    | 1              | 1              | 3              | 4            | 3            | 3            | 4                 | 7                 | 3                 |
| <i>Plant 7</i>    | 2              | 2              | 2              | 1            | 2            | 4            | 6                 | 4                 | 4                 |
| <i>Plant 8</i>    | 0              | 4              | 2              | 3            | 4            | 4            | 6                 | 6                 | 4                 |

**Supplementary Table S3:** rhAmp allelic discrimination assay details for SNP93 testing.

| Primer                     | Sequence                      |
|----------------------------|-------------------------------|
| Allele Specific Primer 1 : | TGCTGCAGATACAAGATATATCAAAAC   |
| Allele Specific Primer 2 : | ATGCTGCAGATACAAGATATATCAAAAT  |
| Locus Specific Primer :    | GCAAGTCTGAATTTCTGATCTCATCTTTA |
